# Supplementary material for: Detection of chemically induced ecotoxicological effects in rivers of the Nidda catchment (Hessen, Germany) and development of an ecotoxicological, Water Framework Directive–compliant assessment system
Source: Springer Nature journal article supplement (doi:10.1186/s12302-019-0190-4), 2019-01-31
Supplement: MOESM1 [file 12302_2019_190_MOESM1_ESM.doc]

**Additional Information**

**Detection of chemically induced ecotoxicological effects in rivers of the Nidda catchment (Hessen, Germany) and development of an ecotoxicological, Water Framework Directive-compliant assessment system**

Denise J. Brettschneider1*, Andrea Misovic1, Ulrike Schulte-Oehlmann1,
Matthias Oetken1 and Jörg Oehlmann1

1 Goethe University Frankfurt am Main, Institute for Ecology, Evolution and Diversity, Department Aquatic Ecotoxicology, Max-von-Laue-Str. 13, 60438 Frankfurt am Main, Germany

*Corresponding author: [brettschneider@bio.uni-frankfurt.de](mailto:brettschneider@bio.uni-frankfurt.de)

Andrea Misovic: [a.misovic@bio.uni-frankfurt.de](mailto:a.misovic@bio.uni-frankfurt.de)

Ulrike Schulte-Oehlmann: [schulte-oehlmann@bio.uni-frankfurt.de](mailto:schulte-oehlmann@bio.uni-frankfurt.de)

Matthias Oetken: [oetken@bio.uni-frankfurt.de](mailto:oetken@bio.uni-frankfurt.de)

Jörg Oehlmann: [oehlmann@bio.uni-frankfurt.de](mailto:oehlmann@bio.uni-frankfurt.de)

Table of contents

[*S1 - Associated water parameters in active biomonitoring campaigns and laboratory experiments* 2](#__RefHeading___Toc535166257)

[*S2 - Further results of in-vivo screens with combined water/sediment samples (Lab)* 7](#__RefHeading___Toc535166258)

[*S3 - Further results of in-vitro-screens with sediment samples* 7](#__RefHeading___Toc535166259)

[*S4 - Deriving ecotoxicological status classes for in-vivo data* 8](#__RefHeading___Toc535166260)

[*S5 - Deriving ecotoxicological status classes for in-vitro data* 8](#__RefHeading___Toc535166261)

[*S6 - Weighting and merging of status classes* 10](#__RefHeading___Toc535166262)

# S1 - Associated water parameters in active biomonitoring campaigns and laboratory experiments

**Table 5S1:** Associated water parameters in active biomonitoring campaigns at the river Nidda

| **Sampling sites at the river Nidda** | | | | | |
| --- | --- | --- | --- | --- | --- |
| **Parameter** | **Date** | **N1** | **N2** | **N3** | **N4** |
| Average water temperature [°C] | 04.09.2015 | 14.2 | 17.5 | 17.6 | 17.9 |
|  | 07.12.2015 – 04.01.2016 | 7.13 | 6.97 | 7.15 | 7.79 |
|  | 16.03.2016 – 13.04.2016 | 8.00 | 9.17 | 9.37 | 9.31 |
|  | 28.06.2016 – 26.07.2016 | 13.8 | 17.1 | 18.2 | 18.9 |
| pH | 04.09.2015 | 7.70 | 7.50 | 7.50 | 7.90 |
|  | 07.12.2015 | 7.00 | 7.20 | 7.30 | 7.10 |
|  | 16.03.2016 | 7.50 | 7.40 | 7.50 | 8.00 |
|  | 28.06.2016 | 7.70 | 7.30 | 7.40 | 7.50 |
| Electric conductivity [µS/cm] | 04.09.2015 | 208 | 404 | 460 | 1074 |
|  | 07.12.2015 | 137 | 285 | 270 | 535 |
|  | 16.03.2016 | 161 | 358 | 480 | 502 |
|  | 28.06.2016 | 151 | 258 | 318 | 624 |
| O2-concentration [mg/L] | 04.09.2015 | 11.0 | 9.00 | 8.30 | 9.10 |
|  | 07.12.2015 | 11.0 | 9.90 | 10.3 | 10.5 |
|  | 16.03.2016 | 12.5 | 11.5 | 11.7 | 11.6 |
|  | 28.06.2016 | 9.90 | 7.50 | 7.50 | 7.60 |
| O2-saturation [%] | 04.09.2015 | 109 | 93.8 | 87.1 | 93.3 |
|  | 07.12.2015 | 97.6 | 88.2 | 88.9 | 88.9 |
|  | 16.03.2016 | 101 | 93.8 | 96.2 | 97.8 |
|  | 28.06.2016 | 100 | 78.5 | 80.0 | 84.2 |
| Flow velocity [m/s] | 04.09.2015 | 0.40 | 0.20 | 0.40 | 0.30 |
|  | 07.12.2015 | 1.10 | 0.20 | 0.80 | 0.10 |
|  | 16.03.2016 | 0.30 | 0.30 | 1.00 | 0.20 |
|  | 28.06.2016 | 0.40 | 0.30 | 0.40 | 0.20 |
| Ammonium-N [mg/L] | 04.09.2015 | < 0.010 | < 0.010 | < 0.010 | < 0.010 |
|  | 07.12.2015 | 0.10 | 0.10 | < 0.010 | 0.10 |
|  | 16.03.2016 | < 0.010 | 0.30 | 0.30 | 0.10 |
|  | 28.06.2016 | < 0.010 | 0.10 | 0.10 | 0.10 |
| Nitrite-N [mg/L] | 04.09.2015 | < 0.010 | < 0.010 | < 0.010 | 0.10 |
|  | 07.12.2015 | < 0.010 | 0.10 | < 0.010 | 0.10 |
|  | 16.03.2016 | < 0.010 | < 0.010 | 0.10 | 0.10 |
|  | 28.06.2016 | < 0.010 | 0.10 | 0.10 | 0.10 |
| Nitrate-N [mg/L] | 04.09.2015 | 1.30 | 1.80 | 1.70 | 2.70 |
|  | 07.12.2015 | 0.90 | 1.90 | 1.70 | 2.00 |
|  | 16.03.2016 | 1.20 | 2.50 | 2.10 | 2.40 |
|  | 28.06.2016 | 0.80 | 1.20 | 1.30 | 1.80 |
| Orthophosphate-P [mg/L] | 04.09.2015 | 0.10 | 0.30 | 0.30 | 0.30 |
|  | 07.12.2015 | 0.10 | 0.10 | 0.20 | 0.20 |
|  | 16.03.2016 | 0.10 | 0.20 | 0.10 | 0.10 |
|  | 28.06.2016 | 0.80 | 0.20 | 0.20 | 0.20 |
| Sulfate [mg/L] | 04.09.2015 | < 5.00 | 10.0 | 16.0 | 27.0 |
|  | 07.12.2015 | 6.00 | 6.00 | 16.0 | 19.0 |
|  | 16.03.2016 | < 5.00 | 13.0 | 22.0 | 34.0 |
|  | 28.06.2016 | 5.00 | 9.00 | 15.0 | 21.0 |
| Chloride [mg/L] | 04.09.2015 | 10.0 | 40.0 | 40.0 | 190 |
|  | 07.12.2015 | 9.00 | 16.0 | 17.0 | 86.0 |
|  | 16.03.2016 | < 2.50 | 31.0 | 30.0 | 106 |
|  | 28.06.2016 | < 2.50 | 19.0 | 28.0 | 135 |
| Total hardness [°dH] | 04.09.2015 | 5.00 | 8.10 | 8.30 | 13.0 |
|  | 07.12.2015 | 4.30 | 6.00 | 5.10 | 8.10 |
|  | 16.03.2016 | 5.00 | 8.80 | 11.2 | 15.4 |
|  | 28.06.2016 | 6.20 | 7.00 | 7.30 | 13.1 |
| Carbonate hardness [°dH] | 04.09.2015 | 4.90 | 6.20 | 8.00 | 10.2 |
|  | 07.12.2015 | 2.90 | 3.00 | 4.10 | 6.30 |
|  | 16.03.2016 | 3.30 | 6.20 | 9.40 | 11.8 |
|  | 28.06.2016 | 3.60 | 5.20 | 5.20 | 10.1 |
| DOC [mg/L] | 04.09.2015 | < 1.00 | < 1.00 | 2.00 | 4.00 |
|  | 07.12.2015 | < 1.00 | 2.00 | 5.00 | 7.00 |
|  | 16.03.2016 | 3.00 | 9.00 | 9.00 | 8.00 |
|  | 28.06.2016 | 8.00 | 10.0 | 7.00 | 14.0 |
| Loss on ignition [%] | 26.05.2015 | 5.99 | 14.3 | 3.92 | 3.30 |
| Mean grain size in mm  [95%-CI] | 26.05.2015 | 1.93  [0.731-3.12] | 0.038  [0.030-0.046] | 0.269  [0.156-0.381] | 0.740  [0.490-0.990] |

Values < XX indicate that the measured value was below the detection limit.

Average water temperature consists of measurements in 30 minutes intervals over 28 days (except for the first sampling campaign at each river).

Flow velocity was measured in the middle of each river, where cages were exposed.

All remaining parameters are single measurements.

**Table 6S1:** Associated water parameters in active biomonitoring campaigns at the river Usa

| **Sampling sites at the river Usa** | | | | | |
| --- | --- | --- | --- | --- | --- |
| **Parameter** | **Date** | **U1** | **U2** | **U3** | **U4** |
| Average water temperature [°C] | 06.08.2015 | 19.8 | 22.2 | 23.6 | 24.0 |
|  | 04.11.2015 – 02.12.2015 | 8.28 | 8.92 | 9.01 | 11.1 |
|  | 06.01.2015 – 03.02.2015 | 5.09 | 4.85 | 4.87 | 4.70 |
|  | 24.05.2016 – 21.06.2016 | 13.7 | 13.9 | 15.3 | 14.8 |
| pH | 06.08.2015 | 7.30 | 7.70 | 8.00 | 8.20 |
|  | 04.11.2015 | 7.30 | 7.60 | 7.90 | 7.80 |
|  | 06.01.2015 | 7.00 | 7.30 | 7.10 | 7.40 |
|  | 24.05.2016 | 7.30 | 7.60 | 7.70 | 7.50 |
| Electric conductivity [µS/cm] | 06.08.2015 | 360 | 796 | 720 | 5700 |
|  | 04.11.2015 | 358 | 768 | 825 | 4540 |
|  | 06.01.2015 | 297 | 428 | 511 | 1431 |
|  | 24.05.2016 | 225 | 475 | 463 | 2200 |
| O2-concentration [mg/L] | 06.08.2015 | 7.50 | 8.70 | 9.50 | 7.40 |
|  | 04.11.2015 | 9.30 | 10.5 | 10.9 | 9.20 |
|  | 06.01.2015 | 11.9 | 11.4 | 11.5 | 11.0 |
|  | 24.05.2016 | 9.20 | 8.80 | 9.10 | 8.60 |
| O2-saturation [%] | 06.08.2015 | 81.5 | 104 | 111 | 88.4 |
|  | 04.11.2015 | 86.1 | 89.7 | 95.8 | 82.8 |
|  | 06.01.2015 | 95.9 | 95.9 | 96.8 | 93.6 |
|  | 24.05.2016 | 99.2 | 85.8 | 89.5 | 85.7 |
| Flow velocity [m/s] | 06.08.2015 | 0.10 | < 0.10 | 0.10 | 0.40 |
|  | 04.11.2015 | < 0.10 | 0.10 | 0.20 | 0.10 |
|  | 06.01.2015 | 0.30 | 0.40 | 0.50 | 0.50 |
|  | 24.05.2016 | < 0.10 | 0.10 | 0.10 | 0.40 |
| Ammonium-N [mg/L] | 06.08.2015 | < 0.010 | 0.10 | 0.10 | 0.30 |
|  | 04.11.2015 | < 0.010 | < 0.010 | < 0.010 | 0.30 |
|  | 06.01.2015 | < 0.010 | 0.10 | 0.10 | 0.20 |
|  | 24.05.2016 | < 0.010 | 0.10 | 0.20 | < 0.010 |
| Nitrite-N [mg/L] | 06.08.2015 | < 0.010 | < 0.010 | < 0.010 | 0.20 |
|  | 04.11.2015 | < 0.010 | < 0.010 | < 0.010 | 0.10 |
|  | 06.01.2015 | < 0.010 | 0.10 | 0.10 | 0.10 |
|  | 24.05.2016 | 0.10 | 0.10 | 0.10 | 0.20 |
| Nitrate-N [mg/L] | 06.08.2015 | 2.30 | 6.40 | 3.50 | 3.40 |
|  | 04.11.2015 | 1.40 | 5.70 | 4.60 | 4.80 |
|  | 06.01.2015 | 3.40 | 4.20 | 3.90 | 4.40 |
|  | 24.05.2016 | 2.60 | 5.50 | 3.70 | 4.00 |
| Orthophosphate-P [mg/L] | 06.08.2015 | 0.10 | 0.30 | 0.10 | 0.50 |
|  | 04.11.2015 | < 0.0025 | 0.20 | 0.10 | 0.20 |
|  | 06.01.2015 | 0.20 | 0.30 | 0.30 | 0.20 |
|  | 24.05.2016 | < 0.0025 | 0.20 | 0.20 | 0.30 |
| Sulfate [mg/L] | 06.08.2015 | 80.0 | 110 | 140 | 140 |
|  | 04.11.2015 | 28.0 | 44.0 | 45.0 | 52.0 |
|  | 06.01.2015 | 25.0 | 30.0 | 31.0 | 32.0 |
|  | 24.05.2016 | 20.0 | 39.0 | 33.0 | 45.0 |
| Chloride [mg/L] | 06.08.2015 | 30.0 | 88.0 | 110 | 1640 |
|  | 04.11.2015 | 37.0 | 91.0 | 123 | 11700 |
|  | 06.01.2015 | 22.0 | 34.0 | 34.0 | 270 |
|  | 24.05.2016 | 35.0 | 71.0 | 68.0 | 280 |
| Total hardness [°dH] | 06.08.2015 | 8.00 | 14.0 | 10.9 | 31.0 |
|  | 04.11.2015 | 9.80 | 14.3 | 14.1 | 34.4 |
|  | 06.01.2015 | 7.20 | 7.20 | 8.30 | 2.90 |
|  | 24.05.2016 | 7.40 | 10.8 | 8.40 | 20.0 |
| Carbonate hardness [°dH] | 06.08.2015 | 5.70 | 9.00 | 7.90 | 16.9 |
|  | 04.11.2015 | 5.10 | 9.10 | 5.30 | 5.00 |
|  | 06.01.2015 | 2.90 | 3.90 | 3.90 | 6.00 |
|  | 24.05.2016 | 4.10 | 7.40 | 6.00 | 12.4 |
| DOC [mg/L] | 06.08.2015 | 3.00 | 7.00 | 6.00 | 6.00 |
|  | 04.11.2015 | 5.00 | 8.00 | 9.00 | 10.0 |
|  | 06.01.2015 | 4.00 | 6.00 | 6.00 | 9.00 |
|  | 24.05.2016 | 11.0 | 10.0 | 10.0 | 11.0 |
| Loss on ignition [%] | 26.05.2015 | 3.31 | 2.18 | 2.45 | 10.6 |
| Mean grain size in mm  [95%-CI] | 26.05.2015 | 1.51  [0.717-2.29] | 1.43  [0.609-2.25] | 1.05  [0.634-1.46] | 0.208  [0.159-0.257] |

Values < XX indicate that the measured value was below the detection limit.

Average water temperature consists of measurements in 30 minutes intervals over 28 days (except for the first sampling campaign at each river).

Flow velocity was measured in the middle of each river, where cages were exposed.

All remaining parameters are single measurements.

**Table 7S1:** Associated water parameters in active biomonitoring campaigns at the river Horloff

| **Sampling sites at the river Horloff** | | | | | |
| --- | --- | --- | --- | --- | --- |
| **Parameter** | **Date** | **H1** | **H2** | **H3** | **H4** |
| Average water temperature [°C] | 01.07.2015 | 19.2 | 21.0 | 22.7 | 27.2 |
|  | 05.10.2015 – 02.11.2015 | 11.7 | 9.49 | 12.7 | 11.5 |
|  | 19.04.2016 – 17.05.2016 | 10.5 | 13.3 | 11.3 | 13.4 |
|  | 17.08.2016 – 14.09.2016 | 16.6 | 16.7 | 20.1 | 19.5 |
| pH | 01.07.2015 | 7.20 | 7.40 | 8.30 | 7.60 |
|  | 05.10.2015 | 7.40 | 8.30 | 7.70 | 9.20 |
|  | 19.04.2016 | 7.20 | 7.20 | 7.70 | 8.00 |
|  | 17.08.2016 | 7.70 | 7.70 | 7.70 | 7.70 |
| Electric conductivity [µS/cm] | 01.07.2015 | 409 | 452 | 997 | 965 |
|  | 05.10.2015 | 295 | 470 | 993 | 991 |
|  | 19.04.2016 | 283 | 165 | 277 | 329 |
|  | 17.08.2016 | 175 | 271 | 571 | 611 |
| O2-concentration [mg/L] | 01.07.2015 | 6.90 | 6.90 | 6.00 | 6.50 |
|  | 05.10.2015 | 7.50 | 8.70 | 9.50 | 7.40 |
|  | 19.04.2016 | 11.6 | 11.1 | 10.0 | 10.0 |
|  | 17.08.2016 | 9.30 | 8.80 | 7.10 | 6.90 |
| O2-saturation [%] | 01.07.2015 | 91.2 | 81.4 | 75.1 | 84.1 |
|  | 05.10.2015 | 81.5 | 104 | 111 | 88.4 |
|  | 19.04.2016 | 101 | 99.3 | 93.5 | 100 |
|  | 17.08.2016 | 94.9 | 90.9 | 80.7 | 81.6 |
| Flow velocity [m/s] | 01.07.2015 | < 0.10 | 0.10 | 0.70 | < 0.10 |
|  | 05.10.2015 | < 0.10 | 0.10 | 0.50 | < 0.10 |
|  | 19.04.2016 | 0.20 | 0.20 | 0.40 | 0.20 |
|  | 17.08.2016 | 0.20 | 0.20 | 0.20 | 0.10 |
| Ammonium-N [mg/L] | 01.07.2015 | 0.10 | 0.20 | 0.30 | 0.30 |
|  | 05.10.2015 | < 0.010 | < 0.010 | 0.10 | 0.10 |
|  | 19.04.2016 | < 0.010 | 0.10 | 0.10 | 0.10 |
|  | 17.08.2016 | < 0.010 | < 0.010 | 0.10 | 0.10 |
| Nitrite-N [mg/L] | 01.07.2015 | < 0.010 | < 0.010 | 0.10 | 0.20 |
|  | 05.10.2015 | < 0.010 | < 0.010 | < 0.010 | 0.10 |
|  | 19.04.2016 | < 0.010 | < 0.010 | < 0.010 | < 0.010 |
|  | 17.08.2016 | < 0.010 | < 0.010 | < 0.010 | 0.10 |
| Nitrate-N [mg/L] | 01.07.2015 | 1.80 | 8.90 | 7.90 | 7.20 |
|  | 05.10.2015 | 0.40 | 1.10 | 2.00 | 1.90 |
|  | 19.04.2016 | 7.40 | < 0.10 | 0.70 | 0.90 |
|  | 17.08.2016 | 0.60 | 1.30 | 2.80 | 3.20 |
| Orthophosphate-P [mg/L] | 01.07.2015 | 0.10 | 0.20 | 0.40 | 0.30 |
|  | 05.10.2015 | < 0.0025 | 0.10 | 0.10 | 0.10 |
|  | 19.04.2016 | 0.10 | 0.10 | 0.20 | 0.20 |
|  | 17.08.2016 | 0.10 | 0.10 | 0.10 | 0.10 |
| Sulfate [mg/L] | 01.07.2015 | 8.00 | 16.0 | 46.0 | 43.0 |
|  | 05.10.2015 | 3.00 | 9.00 | 30.0 | 34.0 |
|  | 19.04.2016 | 8.00 | 10.0 | 21.0 | 25.0 |
|  | 17.08.2016 | 4.00 | 11.0 | 29.0 | 31.0 |
| Chloride [mg/L] | 01.07.2015 | - | - | - | - |
|  | 05.10.2015 | 76.0 | 270 | 102 | 95.0 |
|  | 19.04.2016 | < 2.50 | < 2.50 | 20.0 | 25.0 |
|  | 17.08.2016 | 15.0 | 12.0 | 81.0 | 74.0 |
| Total hardness [°dH] | 01.07.2015 | 7.60 | 11.8 | 14.0 | 15.4 |
|  | 05.10.2015 | 7.2 | 11.0 | 14.0 | 16.0 |
|  | 19.04.2016 | 4.40 | 5.90 | 9.90 | 9.90 |
|  | 17.08.2016 | 7.20 | 11.0 | 12.4 | 14.0 |
| Carbonate hardness [°dH] | 01.07.2015 | 7.60 | 11.4 | 17.4 | 18.0 |
|  | 05.10.2015 | 6.20 | 10.1 | 19.2 | 20.4 |
|  | 19.04.2016 | 8.00 | 5.00 | 6.40 | 6.40 |
|  | 17.08.2016 | 5.10 | 8.00 | 13.4 | 14.0 |
| DOC [mg/L] | 01.07.2015 | 11.0 | 7.00 | 14.0 | 12.0 |
|  | 05.10.2015 | 5.00 | 4.00 | 8.00 | 8.00 |
|  | 19.04.2016 | < 1.00 | 3.00 | 4.00 | 5.00 |
|  | 17.08.2016 | 4.00 | 4.00 | 7.00 | 4.00 |
| Loss on ignition [%] | 26.05.2015 | 7.96 | 6.63 | 8.34 | 10.2 |
| Mean grain size in mm  [95%-CI] | 26.05.2016 | 0.217  [0.162-0.272] | 0.220  [0.156-0.284] | 0.062  [0.050-0.073] | 0.056  [0.042-0.071] |

Values < XX indicate that the measured value was below the detection limit.

Average water temperature consists of measurements in 30 minutes intervals over 28 days (except for the first sampling campaign at each river).

Flow velocity was measured in the middle of each river, where cages were exposed.

All remaining parameters are single measurements.

“-“ illustrates that no measurement was conducted.

**Table 8S1: Average associated water parameters in laboratory experiments with G. fossarum**

| **Nidda** | | | | | | |
| --- | --- | --- | --- | --- | --- | --- |
| **Parameter** | **Date** | **Control** | **N1** | **N2** | **N3** | **N4** |
| Water temperature [°C] | 05.09.2015-03.10.2015 | 10.4 | 9.87 | 9.17 | 8.90 | 9.27 |
|  | 08.12.2015-05.01.2016 | 10.7 | 10.5 | 10.2 | 10.3 | 9.73 |
|  | 17.03.2016-14.04.2016 | 10.5 | 10.5 | 10.0 | 10.3 | 10.6 |
|  | 29.06.2016-27.07.2016 | 9.60 | 10.0 | 9.33 | 8.97 | 9.53 |
| pH | 05.09.2015-03.10.2015 | 7.74 | 7.98 | 7.93 | 8.10 | 8.06 |
|  | 08.12.2015-05.01.2016 | 7.52 | 7.76 | 7.72 | 7.72 | 7.79 |
|  | 17.03.2016-14.04.2016 | 8.10 | 8.36 | 8.16 | 8.45 | 8.31 |
|  | 29.06.2016-27.07.2016 | 7.23 | 7.62 | 7.74 | 7.79 | 7.29 |
| Electric conductivity [µS/cm] | 05.09.2015-03.10.2015 | 665 | 146 | 368 | 418 | 864 |
|  | 08.12.2015-05.01.2016 | 719 | 177 | 233 | 305 | 566 |
|  | 17.03.2016-14.04.2016 | 590 | 258 | 359 | 478 | 708 |
|  | 29.06.2016-27.07.2016 | 539 | 132 | 245 | 334 | 521 |
| O2-concentration [mg/L] | 05.09.2015-03.10.2015 | 9.03 | 9.82 | 10.2 | 9.92 | 9.94 |
|  | 08.12.2015-05.01.2016 | 9.60 | 8.54 | 8.55 | 8.74 | 8.66 |
|  | 17.03.2016-14.04.2016 | 10.8 | 10.7 | 9.55 | 10.4 | 10.1 |
|  | 29.06.2016-27.07.2016 | 10.8 | 11.0 | 11.2 | 11.2 | 11.2 |
| O2-saturation [%] | 05.09.2015-03.10.2015 | 95.0 | 96.8 | 99.7 | 97.3 | 97.5 |
|  | 08.12.2015-05.01.2016 | 90.9 | 79.6 | 78.6 | 79.1 | 78.6 |
|  | 17.03.2016-14.04.2016 | 97.1 | 95.9 | 86.7 | 95.0 | 93.7 |
|  | 29.06.2016-27.07.2016 | 96.7 | 98.0 | 97.9 | 98.7 | 98.1 |
| **Usa** | | | | | | |
| **Parameter** | **Date** | **Control** | **U1** | **U2** | **U3** | **U4** |
| Water temperature [°C] | 07.08.2015-04.09.2015 | 10.9 | 10.1 | 9.95 | 9.75 | 9.68 |
|  | 05.11.2015-03.12.2015 | 10.8 | 10.2 | 9.85 | 9.35 | 10.0 |
|  | 07.01.2016-04.02.2016 | 10.6 | 10.2 | 9.90 | 9.58 | 9.78 |
|  | 25.05.2016-22.06.2016 | 10.6 | 9.60 | 9.40 | 9.00 | 9.60 |
| pH | 07.08.2015-04.09.2015 | 7.87 | 8.22 | 8.22 | 8.35 | 8.37 |
|  | 05.11.2015-03.12.2015 | 7.80 | 7.99 | 8.28 | 8.38 | 8.68 |
|  | 07.01.2016-04.02.2016 | 8.21 | 7.14 | 7.94 | 8,12 | 8,20 |
|  | 25.05.2016-22.06.2016 | 8.49 | 8.04 | 8.10 | 7.79 | 7.92 |
| Electric conductivity [µS/cm] | 07.08.2015-04.09.2015 | 762 | 269 | 730 | 679 | 5259 |
|  | 05.11.2015-03.12.2015 | 593 | 256 | 642 | 779 | 4243 |
|  | 07.01.2016-04.02.2016 | 675 | 318 | 522 | 517 | 1385 |
|  | 25.05.2016-22.06.2016 | 558 | 263 | 441 | 571 | 495 |
| O2-concentration [mg/L] | 07.08.2015-04.09.2015 | 9.84 | 10.4 | 9.73 | 10.4 | 10.4 |
|  | 05.11.2015-03.12.2015 | 9.68 | 9.12 | 8.75 | 9.30 | 9.33 |
|  | 07.01.2016-04.02.2016 | 9.45 | 9.08 | 9.25 | 9.87 | 9.98 |
|  | 25.05.2016-22.06.2016 | 9.34 | 10.2 | 9.27 | 9.76 | 10.3 |
| O2-saturation [%] | 07.08.2015-04.09.2015 | 89.1 | 96.5 | 91.2 | 97.1 | 97.0 |
|  | 05.11.2015-03.12.2015 | 84.0 | 85.3 | 83.5 | 83.7 | 84.8 |
|  | 07.01.2016-04.02.2016 | 81.2 | 84.6 | 87.4 | 91,1 | 94.3 |
|  | 25.05.2016-22.06.2016 | 82.3 | 96.4 | 84.1 | 89.7 | 97.3 |
| **Horloff** | | | | | | |
| **Parameter** | **Date** | **Control** | **H1** | **H2** | **H3** | **H4** |
| Water temperature [°C] | 02.07.2015-30.07.2015 | **-** | **-** | **-** | **-** | **-** |
|  | 06.10.2015-03.11.2015 | 10.3 | 10.3 | 9.67 | 9.43 | 9.78 |
|  | 20.04.2016-18.05.2016 | 10.7 | 10.3 | 9.30 | 9.70 | 9.90 |
|  | 18.08.2016-15.09.2016 | 10.2 | 10.1 | 9.83 | 9.87 | 9.94 |
| pH | 02.07.2015-30.07.2015 | **-** | **-** | **-** | **-** | **-** |
|  | 06.10.2015-03.11.2015 | 8.04 | 8.09 | 8.58 | 8.65 | 8.65 |
|  | 20.04.2016-18.05.2016 | 8.14 | 8.36 | 8.19 | 8.27 | 8.29 |
|  | 18.08.2016-15.09.2016 | 8.05 | 8.22 | 8.27 | 8.35 | 8.38 |
| Electric conductivity [µS/cm] | 02.07.2015-30.07.2015 | **-** | **-** | **-** | **-** | **-** |
|  | 06.10.2015-03.11.2015 | 680 | 223 | 378 | 784 | 894 |
|  | 20.04.2016-18.05.2016 | 580 | 212 | 218 | 398 | 392 |
|  | 18.08.2016-15.09.2016 | 620 | 197 | 302 | 684 | 724 |
| O2-concentration [mg/L] | 02.07.2015-30.07.2015 | **-** | **-** | **-** | **-** | **-** |
|  | 06.10.2015-03.11.2015 | 8.27 | 8.69 | 8.91 | 8.90 | 8.15 |
|  | 20.04.2016-18.05.2016 | 8.12 | 8.34 | 9.03 | 8.45 | 8.29 |
|  | 18.08.2016-15.09.2016 | 8.31 | 8.74 | 8.11 | 8.32 | 8.22 |
| O2-saturation [%] | 02.07.2015-30.07.2015 | **-** | **-** | **-** | **-** | **-** |
|  | 06.10.2015-03.11.2015 | 78.8 | 79.1 | 78.4 | 74.4 | 75.5 |
|  | 20.04.2016-18.05.2016 | 73.2 | 78.9 | 82.5 | 81.3 | 80.4 |
|  | 18.08.2016-15.09.2016 | 81.2 | 85.3 | 81.7 | 80.3 | 79.2 |

02.07.2015: no laboratory test conducted.
Every value consists of four measurements.

**Table 9S1: Average associated water parameters in laboratory experiments with P. antipodarum**

| **Nidda** | | | | | | |
| --- | --- | --- | --- | --- | --- | --- |
| **Parameter** | **Date** | **Control** | **N1** | **N2** | **N3** | **N4** |
| Water temperature [°C] | 05.09.2015-03.10.2015 | 16.3 | 16.3 | 16.3 | 16.4 | 16.1 |
|  | 08.12.2015-05.01.2016 | 16.1 | 15.3 | 15.6 | 15.8 | 15.6 |
|  | 17.03.2016-14.04.2016 | 15.4 | 15.3 | 15.4 | 15.2 | 15.1 |
|  | 29.06.2016-27.07.2016 | 15.1 | 15.5 | 15.2 | 15.1 | 15.4 |
| pH | 05.09.2015-03.10.2015 | 8.15 | 8.07 | 7.91 | 7.96 | 8.05 |
|  | 08.12.2015-05.01.2016 | 8.05 | 7.99 | 7.91 | 7.97 | 8.04 |
|  | 17.03.2016-14.04.2016 | 8.29 | 7.90 | 8.15 | 8.37 | 8.40 |
|  | 29.06.2016-27.07.2016 | 8.06 | 7.64 | 7.72 | 8.01 | 8.01 |
| Electric conductivity [µS/cm] | 05.09.2015-03.10.2015 | 767 | 174 | 373 | 447 | 1028 |
|  | 08.12.2015-05.01.2016 | 785 | 162 | 227 | 301 | 546 |
|  | 17.03.2016-14.04.2016 | 708 | 175 | 296 | 420 | 754 |
|  | 29.06.2016-27.07.2016 | 677 | 139 | 232 | 337 | 574 |
| O2-concentration [mg/L] | 05.09.2015-03.10.2015 | 9.44 | 9.27 | 9.78 | 9.83 | 9.28 |
|  | 08.12.2015-05.01.2016 | 8.08 | 8.41 | 8.45 | 8.54 | 8.46 |
|  | 17.03.2016-14.04.2016 | 9.44 | 9.29 | 8.96 | 9.69 | 9.69 |
|  | 29.06.2016-27.07.2016 | 9.56 | 9.68 | 9.72 | 9.61 | 9.48 |
| O2-saturation [%] | 05.09.2015-03.10.2015 | 95.2 | 93.4 | 98.7 | 98.6 | 92.7 |
|  | 08.12.2015-05.01.2016 | 82.3 | 85.5 | 84.8 | 84.8 | 85.6 |
|  | 17.03.2016-14.04.2016 | 97.1 | 94.5 | 91.7 | 98.6 | 98.1 |
|  | 29.06.2016-27.07.2016 | 97.6 | 98.2 | 98.4 | 98.3 | 98.9 |
| **Usa** | | | | | | |
| **Parameter** | **Date** | **Control** | **U1** | **U2** | **U3** | **U4** |
| Water temperature [°C] | 07.08.2015-04.09.2015 | 17.0 | 17.0 | 17.0 | 17.0 | 16.7 |
|  | 05.11.2015-03.12.2015 | 16.5 | 16.0 | 16.1 | 16.1 | 16.1 |
|  | 07.01.2016-04.02.2016 | 15.0 | 15.6 | 15.2 | 15.2 | 15.1 |
|  | 25.05.2016-22.06.2016 | 16.8 | 16.1 | 15.2 | 15.1 | 15.3 |
| pH | 07.08.2015-04.09.2015 | 7.89 | 7.83 | 8.27 | 8.28 | 8.35 |
|  | 05.11.2015-03.12.2015 | 8.15 | 7.58 | 8.16 | 8.22 | 8.45 |
|  | 07.01.2016-04.02.2016 | 8.36 | 7.84 | 8.17 | 8.07 | 8.04 |
|  | 25.05.2016-22.06.2016 | 7.59 | 8.27 | 8.19 | 8.30 | 8.29 |
| Electric conductivity [µS/cm] | 07.08.2015-04.09.2015 | 818 | 267 | 760 | 733 | 5639 |
|  | 05.11.2015-03.12.2015 | 764 | 347 | 720 | 838 | 4330 |
|  | 07.01.2016-04.02.2016 | 858 | 279 | 485 | 489 | 1591 |
|  | 25.05.2016-22.06.2016 | 676 | 256 | 422 | 487 | 1963 |
| O2-concentration [mg/L] | 07.08.2015-04.09.2015 | 9.24 | 9.23 | 9.52 | 9.06 | 9.23 |
|  | 05.11.2015-03.12.2015 | 8.39 | 8.76 | 8.80 | 8.56 | 8.63 |
|  | 07.01.2016-04.02.2016 | 9.45 | 9.47 | 9.61 | 9.62 | 9.65 |
|  | 25.05.2016-22.06.2016 | 9.66 | 8.73 | 9.69 | 9.66 | 9.69 |
| O2-saturation [%] | 07.08.2015-04.09.2015 | 94.9 | 98.3 | 98.1 | 94.9 | 96.4 |
|  | 05.11.2015-03.12.2015 | 85.6 | 91.8 | 90.5 | 88.4 | 89.3 |
|  | 07.01.2016-04.02.2016 | 96.1 | 97.2 | 97.6 | 97.4 | 97.5 |
|  | 25.05.2016-22.06.2016 | 98.6 | 89.7 | 98.6 | 98.6 | 98.6 |
| **Horloff** | | | | | | |
| **Parameter** | **Date** | **Control** | **H1** | **H2** | **H3** | **H4** |
| Water temperature [°C] | 02.07.2015-30.07.2015 | **-** | **-** | **-** | **-** | **-** |
|  | 06.10.2015-03.11.2015 | 16.2 | 16.0 | 15.9 | 15.5 | 15.9 |
|  | 20.04.2016-18.05.2016 | 16.6 | 15.8 | 15.9 | 16.1 | 15.9 |
|  | 18.08.2016-15.09.2016 | 16.4 | 16.2 | 16.0 | 15.8 | 16.0 |
| pH | 02.07.2015-30.07.2015 | **-** | **-** | **-** | **-** | **-** |
|  | 06.10.2015-03.11.2015 | 8.31 | 7.87 | 8.61 | 8.52 | 8.58 |
|  | 20.04.2016-18.05.2016 | 8.35 | 8.26 | 8.02 | 8.31 | 8.45 |
|  | 18.08.2016-15.09.2016 | 8.34 | 8.27 | 8.22 | 8.45 | 8.52 |
| Electric conductivity [µS/cm] | 02.07.2015-30.07.2015 | **-** | **-** | **-** | **-** | **-** |
|  | 06.10.2015-03.11.2015 | 844 | 183 | 392 | 862 | 910 |
|  | 20.04.2016-18.05.2016 | 684 | 75,6 | 144 | 339 | 349 |
|  | 18.08.2016-15.09.2016 | 745 | 189 | 314 | 679 | 732 |
| O2-concentration [mg/L] | 02.07.2015-30.07.2015 | **-** | **-** | **-** | **-** | **-** |
|  | 06.10.2015-03.11.2015 | 8.81 | 8.51 | 8.37 | 8.34 | 8.02 |
|  | 20.04.2016-18.05.2016 | 8.87 | 9.57 | 9.66 | 8.73 | 9.69 |
|  | 18.08.2016-15.09.2016 | 8.84 | 8.42 | 8.57 | 8.61 | 8.72 |
| O2-saturation [%] | 02.07.2015-30.07.2015 | **-** | **-** | **-** | **-** | **-** |
|  | 06.10.2015-03.11.2015 | 89.1 | 87.6 | 85.8 | 85.6 | 84.5 |
|  | 20.04.2016-18.05.2016 | 89.9 | 98.4 | 98.6 | 89.7 | 98.6 |
|  | 18.08.2016-15.09.2016 | 89.5 | 85.3 | 87.4 | 87.2 | 90.3 |

02.07.2015: no laboratory test conducted.
Every mean value consists of four measurements.

# S2 - Further results of in-vivo screens with combined water/sediment samples (Lab)

No significant differences between combined water/sediment samples could be detected in laboratory experiments with *Lumbriculus variegatus* (fig. 6S2).

# *S3 - Further results of in-vitro-screens with sediment samples*

The LOQ for the YAES screen with sediment samples was 11.7 mg OHT-EG/kg and the LOQ for the YAAS assay with sediment samples lay by 3.02 mg Flu-EQ/kg.

**Table 10S3:** Anti-estrogenic and anti-androgenic activities and mean EC50 values for baseline toxicity and their standard errors of the mean for sediment samples from the rivers Nidda, Usa and Horloff

| **River** | | **Sediment sample** | | |
| --- | --- | --- | --- | --- |
| **YAES [OHT-EQ mg/kg]** | **YAAS [Flu-EQ µg/kg]** | **Microtox [EC50 mg Sed.-EQ ± SEM]** |
| **Nidda** | **N1** | 58.0 | < 3,020 | 8.98 ± 10.0 |
| **N2** | - | < 3,020 | 5.33 ± 2.17 |
| **N3** | 74.9 | < 3,020 | 5.92 ± 5.43 |
| **N4** | - | 11,114 | 4.40 ± 3.60 |
| **Usa** | **U1** | 144 | < 3,020 | 15.7 ± 12.1 |
| **U2** | 108 | < 3,020 | 14.9 ± 13.9 |
| **U3** | 181 | < 3,020 | 11.1 ± 12.2 |
| **U4** | 559 | < 3,020 | 5.15 ± 2.94 |
| **Horloff** | **H1** | 93.0 | 3,612 | 9.36 ± 5.74 |
| **H2** | - | 3,408 | 4.47 ± 1.83 |
| **H3** | 135 | < 3,020 | 4.88 ± 4.50 |
| **H4** | - | < 3,020 | 5.21 ± 4.32 |

“-“ – no measurement conducted

For non-toxic sediment samples in the microtox assay the EC50 threshold value is 30 mg sediment-equivalents

# *S4 - Deriving ecotoxicological status classes for in-vivo data*

In case of more than 20% mortality of *P. antipodarum*, the sampling sites or the combined water/sediment samples were classified based on the mortality of *P. antipodarum*. In case of 20% mortality or less, the sampling sites or the environmental samples were classified according to the percentage difference in embryo numbers compared to the corresponding reference site. The same procedure with adapted class boundaries was performed to classify the results of the gammarids (tab. 4).

# *S5 - Deriving ecotoxicological status classes for in-vitro data*

With the proposed EQS for 17β-estradiol of 0.4 ng/L from the European Union watch list the following five status classes were derived (Table 11S5).

**Table 11S5:** Classification system for the evaluation of YES results in water samples

| **Status class** | | **YES [EEQ ng/L]** | **EQS threshold** |
| --- | --- | --- | --- |
| 1 | high | x < 0.2 | x < 0.5*EQS |
| 2 | good | 0.2 ≤ x < 0.4 | 0.5*EQS ≤ x < EQS |
| 3 | moderate | 0.4 ≤ x < 0.8 | EQS ≤ x < 2*EQS |
| 4 | poor | 0.8 ≤ x < 1.2 | 2*EQS ≤ x < 3*EQS |
| 5 | bad | x ≥ 1.2 | x ≥ 3*EQS |

“x” – YES results in ng 17β-estradiol-equivalents per liter

EQS proposal for 17β-estradiol according to the European Union watchlist: 0.4 ng/L

For in-vitro data for which no EQS proposals exist, the iterative method according to Erhardt et al. was performed. Therefore, a normal value was calculated, which summarizes a homogeneous group of low values, that reflects the background level. To determine the normal value, the mean value of a measurement series is calculated and 1.96 times the standard deviation is added. All data in the measurement series that exceed this value is deleted. The remaining data was used as new initial values in the step sequence. This process continues until none of the values exceeded the mean value plus 1.96 times the standard deviation. The result is a group of measured values adjusted from extreme values, whose mean value indicates the normal value. Five classes were formed according to Duft & Oehlmann [6] using this normal value (N) and the standard deviation (SD). The class boundaries were formed as described in Table 12S5.

**Table 12S5:** Overview of the class boundaries for deriving classification systems according to Erhardt et al.  and Duft & Oehlmann [6]

| **Status class** | | **Threshold** |
| --- | --- | --- |
| 1 | high | x < N - SD |
| 2 | good | N – SD ≤ x < N + SD |
| 3 | moderate | N + SD ≤ x < N + 3SD |
| 4 | poor | N + 3SD ≤ x < N + 6SD |
| 5 | bad | x ≥ N + 6SD |

“N” – normal value, “SD” – standard deviation, “x” – activity of a substance

For example, a normal value of 0.00 mg OHT-EQ/L and a standard deviation of 29.6 mg OHT-EQ/L was calculated for the YAES with water samples, thus resulting in the following classification system (Table 13S5).

**Table 13S5:** Classification system for the evaluation of YAES results in water samples

| **Status class** | | **YAES [OHT-EQ mg/L]** |
| --- | --- | --- |
| 1 | high | x ≤ 0.00 |
| 2 | good | 0.00 < x < 29.6 |
| 3 | moderate | 29.6 ≤ x < 88.9 |
| 4 | poor | 88.9 ≤ x < 178 |
| 5 | bad | x ≥ 178 |

“x” – anti-estrogenic activities in mg 4-hydroxytamoxifen-equivalents per liter

# *S6 - Weighting and merging of status classes*

The extended evaluation matrix for river water and river sediment also includes the status classes of laboratory experiments with *P. antipodarum* und *G. fossarum*. Thereby, the status classes of the active biomonitoring campaigns with *P. antipodarum* and *G. fossarum* were weighted with 30% each, and the laboratory experiments with 10% each. The status classes of the active biomonitoring campaigns were weighted more strongly, because they represent a temporally integrated exposure, in contrast to laboratory experiments, in which only grab samples of the river water and sediment, i.e. only ‘snapshots’ of the current condition of rivers, are used. The weighting of the status classes of the in-vitro assays for water and sediment samples was maintained. This resulted in a status class for field and lab data with water samples, which is represented at the left top of the box in figure 7S6. The status class for field and lab data with sediment samples is depicted at the right top of the box in figure 7S6. The status class for field data with water samples is illustrated in the left middle of the box, and the status class for field data with sediment samples is shown in the right middle of the box in figure 7S6. At the left bottom of the box in figure 7S6 the ecological status class for fish according to HLNUG  and at the right bottom of the box in figure 7S6 the ecological status class for macrozoobenthos according to HLNUG  are presented.
