# Supplementary figures and images for: Detection of chemically induced ecotoxicological effects in rivers of the Nidda catchment (Hessen, Germany) and development of an ecotoxicological, Water Framework Directive–compliant assessment system
Source: Springer Nature journal article supplement (doi:10.1186/s12302-019-0190-4), 2019-01-31

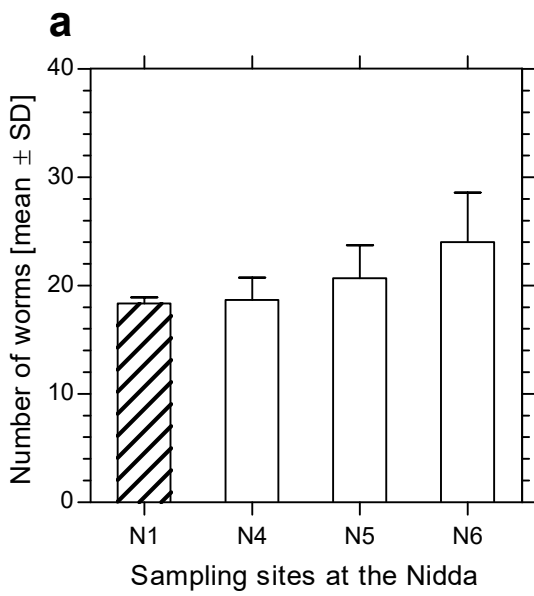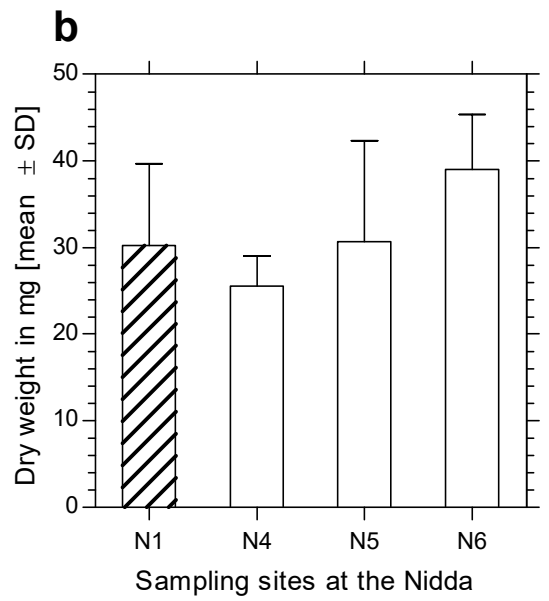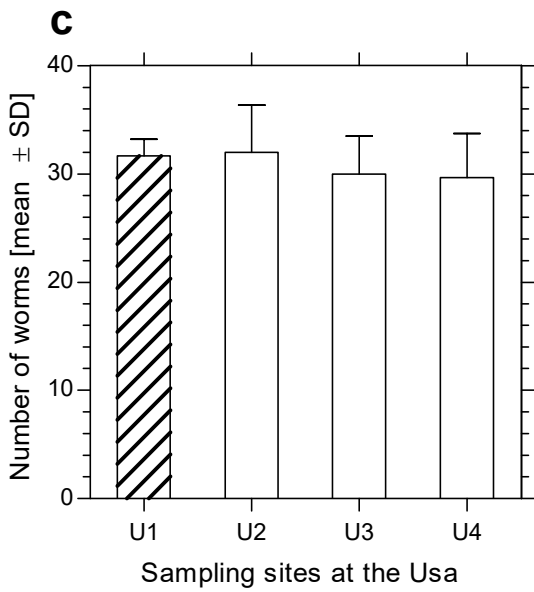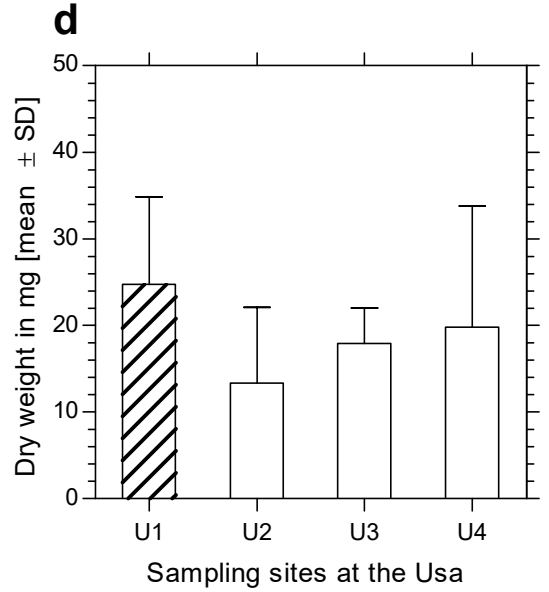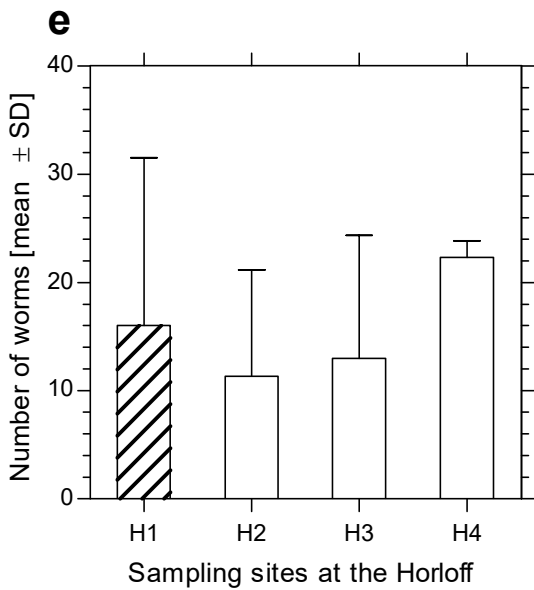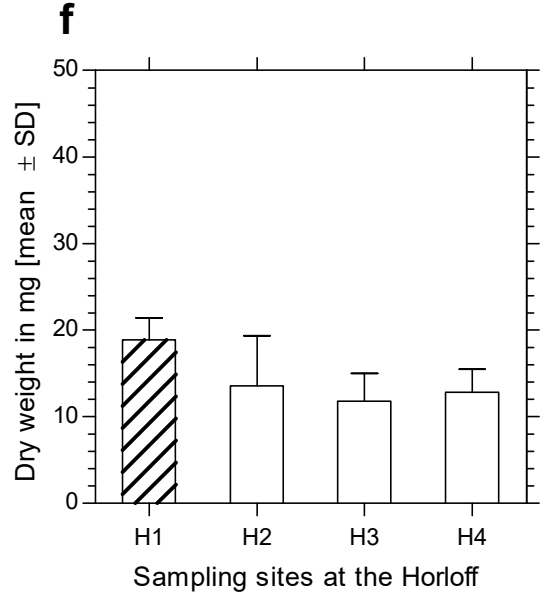

Supplement: MOESM2 [file 12302_2019_190_MOESM2_ESM.pdf]
